# Supplementary material for: Integrative “Omics”-Approach Discovers Dynamic and Regulatory Features of Bacterial Stress Responses
Source: PubMed Central journal article supplement (PMC3688512; doi:10.1371/journal.pgen.1003576), 2013-06-20

## Supporting Information Figure S3

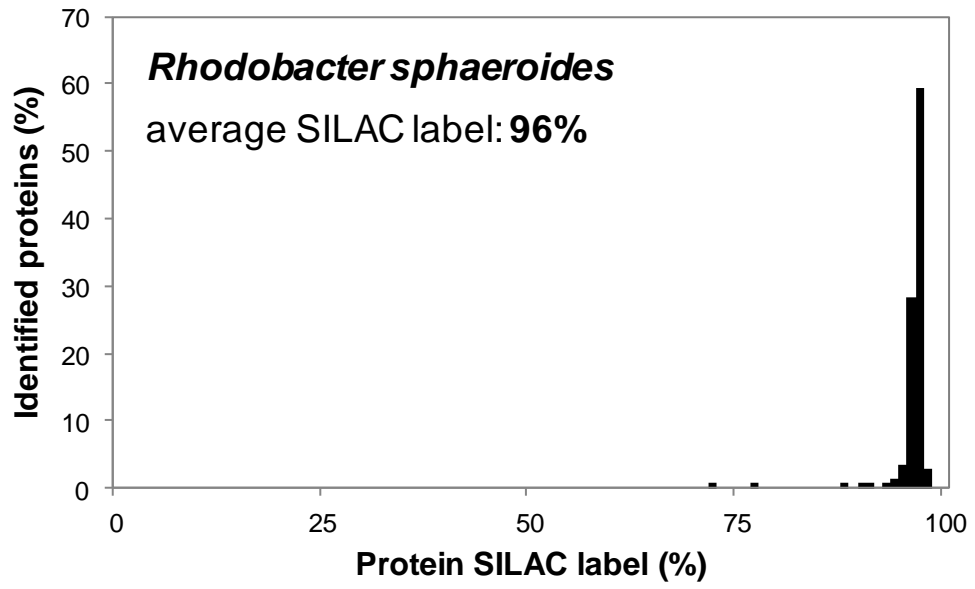

Supplement: pgen.1003576.s005.pdf [file pgen.1003576.s005.pdf]
