# Supplementary material for: Integrative “Omics”-Approach Discovers Dynamic and Regulatory Features of Bacterial Stress Responses
Source: PubMed Central journal article supplement (PMC3688512; doi:10.1371/journal.pgen.1003576), 2013-06-20
Supplement: pgen.1003576.s010.pdf [file pgen.1003576.s010.pdf]

**Table S2. Biological function of genes within RpoE and RpoH2 regulons.**

| Category/<br>Gene No. | Gene<br>Name | log <sub>2</sub> ratio |        |        | Gene description/function                                                             |
|-----------------------|--------------|------------------------|--------|--------|---------------------------------------------------------------------------------------|
|                       |              | 7 min                  | 45 min | 90 min |                                                                                       |
| <b>RpoE regulon</b>   |              |                        |        |        |                                                                                       |
| RSP_2144              | <i>cfaS</i>  | 1.37                   | 1.04   | 1.07   | Cyclopropane-fatty-acyl-phospholipid synthase CfaS                                    |
| RSP_1409              |              | 2.81                   | 4.47   | 4.58   | Beta-Ig-H3/Fasciclin                                                                  |
| RSP_1091              |              | 2.16                   | 1.97   | 2.00   | Putative cyclopropane/cyclopropene fatty acid synthesis protein, flavin amine oxidase |
| RSP_1852              | <i>foIE2</i> | 2.22                   | 2.33   | 2.39   | GTP cyclohydrolase                                                                    |
| RSP_1090              |              | 2.40                   | 1.94   | 2.21   | Putative cyclopropane/cyclopropene fatty acid synthesis protein                       |
| RSP_1092              | <i>rpoE</i>  | 2.23                   | 1.95   | 2.05   | RNA polymerase sigma-70 factor                                                        |
| RSP_1093              | <i>chrR</i>  | 2.05                   | 2.20   | 2.33   | Anti-sigma factor ChrR                                                                |
| RSP_0601              | <i>rpoH2</i> | 1.99                   | 2.13   | 2.24   | RNA polymerase sigma factor                                                           |
| RSP_1089              |              | 1.91                   | 1.85   | 1.91   | sugar/cation symporter, GPH family                                                    |
| RSP_2143              | <i>phrA</i>  | 1.58                   | 1.46   | 1.58   | DNA photolyase, Cryptochrome 1 apoprotein (Blue light photoreceptor)                  |
| RSP_1088              |              | 1.11                   | 0.81   | 0.88   | hypothetical protein                                                                  |
| RSP_1087              |              | 0.91                   | 0.68   | 0.88   | Short-chain dehydrogenase/reductase family member                                     |
| <b>RpoH2 regulon</b>  |              |                        |        |        |                                                                                       |
| RSP_0355              | <i>degP</i>  | 0.45                   | 0.87   | 0.70   | possible serine protease                                                              |
| RSP_0392              | <i>gloA</i>  | 1.00                   | 1.32   | 1.18   | probable lactoylglutathione lyase                                                     |
| RSP_0398              | <i>gluD</i>  | 0.47                   | 1.56   | 1.46   | dehydrogenase                                                                         |
| RSP_0423              |              | 0.44                   | 0.80   | 0.58   | Aldo/keto reductase                                                                   |
| RSP_0799              | <i>gloB</i>  | 1.35                   | 2.11   | 1.84   | Putative hydroxyacylglutathione hydrolase: glyoxalase II                              |
| RSP_0847              | <i>ompR</i>  | 2.45                   | 1.48   | 0.72   | two component transcriptional regulator, winged helix family                          |
| RSP_0899              |              | 0.39                   | 1.04   | 0.76   | Thiol peroxidase                                                                      |
| RSP_1096              |              | 0.56                   | 1.27   | 0.93   | putative zinc protease                                                                |
| RSP_1097              |              | 0.41                   | 1.10   | 0.66   | putative zinc protease                                                                |
| RSP_1173              | <i>dnaK</i>  | 0.93                   | 0.81   | 0.23   | Heat shock protein (Hsp70, Dank)                                                      |
| RSP_1207              | <i>hslO</i>  | 0.84                   | 1.01   | 0.67   | putative Hsp33 protein                                                                |
| RSP_1397              | <i>gst</i>   | 0.40                   | 0.91   | 0.79   | Glutathione S-transferase                                                             |
| RSP_1410              | <i>yedY</i>  | 0.82                   | 1.59   | 1.30   | Sulfite oxidase subunit YedY                                                          |
| RSP_1415              |              | 0.16                   | 1.07   | 0.98   | putative polysaccharide deacetylase                                                   |
| RSP_1421              |              | 0.91                   | 1.42   | 1.13   | hypothetical protein                                                                  |
| RSP_1497              |              | 0.78                   | 0.88   | 0.35   | Putative outer membrane lipoprotein carrier protein                                   |
| RSP_1532              | <i>hslU</i>  | 0.82                   | 0.14   | -0.11  | ATP-dependent protease ATP-binding subunit                                            |
| RSP_1591              | <i>gst</i>   | 1.55                   | 1.92   | 1.92   | Predicted Glutathione S-transferase                                                   |
| RSP_1825              | <i>tldD</i>  | 0.52                   | 0.99   | 0.79   | probable modulator of DNA gyrase                                                      |
| RSP_1852              | <i>foIE2</i> | 2.22                   | 2.33   | 2.39   | GTP cyclohydrolase                                                                    |
| RSP_2268              |              | 0.98                   | 1.39   | 1.26   | metallo Beta lactamase superfamily                                                    |
| RSP_2294              | <i>gloB</i>  | 0.46                   | 0.86   | 0.75   | putative hydroxyacylglutathione hydrolase (glyoxalase II) (GLX II) protein            |
| RSP_2314              |              | 0.68                   | 1.75   | 1.66   | oxidoreductase, Chromogranin/secretogranin                                            |
| RSP_2481              | <i>cysE</i>  | 0.49                   | 0.88   | 0.77   | serine acetyltransferase                                                              |
| RSP_2617              | <i>msrB</i>  | 0.88                   | 1.83   | 1.50   | Peptide methionine sulfoxide reductase                                                |
| RSP_2645              | <i>eda</i>   | 0.07                   | 0.53   | 0.88   | KDPG/KHG bifunctional aldolase                                                        |
| RSP_2735              | <i>pgl</i>   | 0.59                   | 0.99   | 1.18   | 6-phosphogluconolactonase                                                             |
| RSP_2784              | <i>cycG</i>  | 0.40                   | 1.11   | 1.07   | Diheme class I cytochrome c                                                           |
| RSP_2785              | <i>cycF</i>  | 0.40                   | 1.78   | 1.71   | Cytochrome c-554                                                                      |
| RSP_2802              |              | 0.54                   | 1.21   | 0.95   | multidrug/cation efflux pump, membrane fusion protein subunit                         |
| RSP_2854              |              | 0.64                   | 0.94   | 0.77   | Cation/multidrug efflux pump, Membrane fusion protein (MFP) family                    |
| RSP_2973              |              | 0.69                   | 1.37   | 1.24   | Peroxiredoxin                                                                         |
| RSP_3075              |              | 0.95                   | 1.65   | 1.52   | hypothetical protein                                                                  |
| RSP_3076              |              | 1.06                   | 1.85   | 1.79   | hypothetical protein                                                                  |
| RSP_3077              | <i>cryB</i>  | 0.52                   | 1.11   | 1.00   | Cryptochrome (deoxyribodipyrimidine photolyase-related protein)                       |
| RSP_3162              |              | 1.16                   | 0.96   | 0.94   | hypothetical protein                                                                  |
| RSP_3163              |              | 0.99                   | 0.86   | 0.86   | Probable oxidoreductase                                                               |
| RSP_3164              |              | 0.73                   | 1.15   | 0.97   | ferredoxin like protein                                                               |
| RSP_3210              | <i>qxtB</i>  | 1.12                   | 1.13   | 1.10   | Quinol oxidase subunit II QxtB                                                        |
| RSP_3212              | <i>qxtA</i>  | 1.20                   | 2.02   | 1.60   | Quinol oxidase subunit I QxtA                                                         |
| RSP_3272              | <i>ggt</i>   | 0.99                   | 1.25   | 1.31   | Gamma-glutamyltranspeptidase                                                          |
| RSP_3537              |              | 1.13                   | 1.76   | 1.59   | alcohol dehydrogenase, zinc-containing                                                |
