# Supplementary material for: Integrative “Omics”-Approach Discovers Dynamic and Regulatory Features of Bacterial Stress Responses
Source: PubMed Central journal article supplement (PMC3688512; doi:10.1371/journal.pgen.1003576), 2013-06-20
Supplement: pgen.1003576.s011.pdf [file pgen.1003576.s011.pdf]

**Table S3. Biological function of regulated proteins identified by SILAC-based MS.**

| Category/<br>Gene No.           | Gene<br>Name | log <sub>2</sub> ratio<br>90 min | p-value    | Gene description/function                                                             |
|---------------------------------|--------------|----------------------------------|------------|---------------------------------------------------------------------------------------|
| <b>Up-regulated (p&lt;0.05)</b> |              |                                  |            |                                                                                       |
| <b>Stress defense</b>           |              |                                  |            |                                                                                       |
| RSP_0559                        | <i>msrA</i>  | 1.39                             | 0.00037159 | Peptide methionine sulfoxide reductase                                                |
| RSP_0725                        |              | 1.05                             | 0.01931110 | Thioredoxin, thioldisulfide interchange protein                                       |
| RSP_1024                        | <i>moxR</i>  | 1.69                             | 0.00000391 | Putative MoxR family protein                                                          |
| RSP_1219                        | <i>grpE</i>  | 0.97                             | 0.02186640 | chaperone protein GrpE (heat shock protein)                                           |
| RSP_1397                        | <i>gst</i>   | 0.87                             | 0.00000120 | Glutathione S-transferase                                                             |
| RSP_1464                        | <i>dsbA</i>  | 0.91                             | 0.00001458 | putative periplasmic thiol-disulphide interchange protein (DsbA family)               |
| RSP_2083                        | <i>uvrB</i>  | 1.10                             | 0.00001731 | excinuclease ABC subunit B                                                            |
| RSP_2144                        | <i>cfaS</i>  | 1.91                             | 0.03318910 | Cyclopropane-fatty-acyl-phospholipid synthase CfaS                                    |
| RSP_2268                        |              | 1.76                             | 0.00000783 | metallo Beta lactamase superfamily                                                    |
| RSP_2413                        | <i>lig2</i>  | 1.91                             | 0.00044301 | DNA ligase                                                                            |
| RSP_2617                        | <i>msrB</i>  | 1.33                             | 0.00000571 | Peptide methionine sulfoxide reductase                                                |
| RSP_2973                        |              | 1.31                             | 0.00009312 | Peroxiredoxin                                                                         |
| <b>Redox reaction</b>           |              |                                  |            |                                                                                       |
| RSP_0351                        |              | 2.34                             | 0.00001489 | D-threo-aldose 1-dehydrogenase                                                        |
| RSP_0398                        |              | 1.05                             | 0.00046586 | dehydrogenase                                                                         |
| RSP_0423                        |              | 1.04                             | 0.00003887 | Aldo/keto reductase                                                                   |
| RSP_1057                        | <i>merA1</i> | 1.55                             | 0.00869240 | Putative mercuric reductase protein                                                   |
| RSP_1410                        | <i>yedY</i>  | 2.26                             | 0.00000006 | sulfite oxidase subunit YedY                                                          |
| RSP_1869                        | <i>ubiH</i>  | 0.91                             | 0.01205060 | 2-octaprenyl-6-methoxyphenyl hydroxylase                                              |
| RSP_2199                        |              | 1.01                             | 0.00009613 | putative acyl-CoA dehydrogenase                                                       |
| RSP_2395                        |              | 1.15                             | 0.02870860 | BCCP, cytochrome c peroxidase                                                         |
| RSP_2734                        | <i>zwf</i>   | 1.65                             | 0.00001129 | glucose-6-phosphate 1-dehydrogenase                                                   |
| RSP_2785                        | <i>cycF</i>  | 1.52                             | 0.00003505 | Cytochrome c-554                                                                      |
| RSP_2805                        | <i>nemA</i>  | 0.87                             | 0.00005148 | NADH-flavin oxidoreductase                                                            |
| RSP_3163                        |              | 1.04                             | 0.00000163 | Probable oxidoreductase                                                               |
| RSP_3537                        |              | 1.85                             | 0.00000096 | alcohol dehydrogenase, zinc-containing                                                |
| <b>Carbohydrate metabolism</b>  |              |                                  |            |                                                                                       |
| RSP_1415                        |              | 1.08                             | 0.00000249 | putative polysaccharide deacetylase                                                   |
| RSP_2196                        | <i>fadJ</i>  | 0.89                             | 0.00000713 | 3-hydroxyacyl-CoA dehydrogenase                                                       |
| RSP_2197                        |              | 0.91                             | 0.00002879 | acetyl-CoA acetyltransferase                                                          |
| RSP_2550                        | <i>exoK</i>  | 1.67                             | 0.00001272 | endo-beta-1,3-1,4-glycanase protein                                                   |
| RSP_2735                        | <i>pgl</i>   | 1.35                             | 0.00002869 | 6-phosphogluconolactonase                                                             |
| RSP_2736                        | <i>pgi</i>   | 1.06                             | 0.00038861 | glucose-6-phosphate isomerase                                                         |
| <b>Transport process</b>        |              |                                  |            |                                                                                       |
| RSP_1203                        |              | 1.07                             | 0.00288290 | ABC multidrug efflux pump, fused ATPase and inner membrane subunits                   |
| RSP_1204                        |              | 0.96                             | 0.00318036 | ABC multidrug efflux pump, fused ATPase and inner membrane subunits                   |
| RSP_1803                        | <i>ccmC</i>  | 1.10                             | 0.04941210 | ABC heme exporter, inner membrane subunit CcmC                                        |
| RSP_3274                        |              | 1.83                             | 0.00000082 | ABC multidrug/carbohydrate efflux transporter, ATPase subunit                         |
| RSP_3386                        |              | 0.92                             | 0.00004444 | TRAP-T family transporter periplasmic binding protein                                 |
| RSP_3602                        |              | 1.60                             | 0.00000173 | ABC efflux transporter, ATPase subunit                                                |
| <b>Proteases</b>                |              |                                  |            |                                                                                       |
| RSP_0686                        | <i>clpS</i>  | 1.01                             | 0.00002543 | ATP-dependent Clp protease adaptor protein clpS                                       |
| RSP_1076                        | <i>sohB</i>  | 0.85                             | 0.00003405 | Peptidase family S49                                                                  |
| RSP_1096                        |              | 1.61                             | 0.00036976 | putative zinc protease                                                                |
| RSP_1097                        |              | 1.65                             | 0.00001754 | putative zinc protease                                                                |
| RSP_1490                        |              | 1.51                             | 0.00001940 | Putative ATP-dependent protease La, LON                                               |
| RSP_2293                        | <i>clpA</i>  | 1.25                             | 0.00000059 | Chaperonin clpA/B                                                                     |
| <b>Others</b>                   |              |                                  |            |                                                                                       |
| RSP_0013                        |              | 0.99                             | 0.00004301 | hypothetical protein                                                                  |
| RSP_0472                        |              | 1.53                             | 0.00354578 | hypothetical protein                                                                  |
| RSP_0663                        | <i>fhs</i>   | 0.92                             | 0.00069142 | Formate-tetrahydrofolate ligase                                                       |
| RSP_0870                        |              | 0.99                             | 0.00027241 | hypothetical protein                                                                  |
| RSP_0890                        | <i>ttg2</i>  | 0.93                             | 0.00431800 | putative toluene tolerance protein                                                    |
| RSP_1025                        |              | 1.29                             | 0.00001200 | hypothetical protein                                                                  |
| RSP_1091                        |              | 2.82                             | 0.00000099 | Putative cyclopropane/cyclopropene fatty acid synthesis protein, flavin amine oxidase |
| RSP_1197                        | <i>hemH</i>  | 0.94                             | 0.00000402 | ferrochelataase                                                                       |
| RSP_1199                        |              | 0.82                             | 0.00622293 | secreted conserved hypothetical protein                                               |
| RSP_1280                        | <i>cbbX</i>  | 0.98                             | 0.01541340 | CbbX protein                                                                          |
| RSP_1409                        |              | 2.59                             | 0.00101298 | Beta-Ig-H3/Fasciclin                                                                  |
| RSP_1465                        |              | 0.88                             | 0.00553074 | hypothetical protein                                                                  |
| RSP_1497                        | <i>lolA</i>  | 1.40                             | 0.00083363 | Putative outer membrane lipoprotein carrier protein                                   |
| RSP_1540                        |              | 1.63                             | 0.00001676 | Predicted secreted hydrolase                                                          |
| RSP_1546                        | <i>bfr</i>   | 2.22                             | 0.00124273 | Bacterioferritin                                                                      |
| RSP_1760                        |              | 1.21                             | 0.00000598 | hypothetical protein                                                                  |
| RSP_1840                        |              | 1.87                             | 0.00077570 | hypothetical protein                                                                  |

|          |             |      |            |                                                                  |
|----------|-------------|------|------------|------------------------------------------------------------------|
| RSP_1852 |             | 3.79 | 0.00093011 | GTP cyclohydrolase                                               |
| RSP_2163 |             | 1.02 | 0.00055750 | lytic murein transglycosylase, putative                          |
| RSP_2831 | <i>cobO</i> | 0.93 | 0.00409328 | cob(II)yrinic acid a,c-diamide adenosyltransferase               |
| RSP_3599 | <i>phoH</i> | 1.12 | 0.00068785 | phosphate starvation-inducible protein PhoH and related proteins |
| RSP_3721 |             | 1.26 | 0.03749980 | hypothetical protein                                             |
| RSP_4124 |             | 1.02 | 0.00007905 | hypothetical protein                                             |
| RSP_6144 |             | 1.22 | 0.00651711 | conserved hypothetical protein (possible transmembrane)          |
| RSP_6229 |             | 1.66 | 0.00230051 | hypothetical protein                                             |

#### Down-regulated (p<0.05)

##### Photosynthesis

|          |             |       |            |                                                                               |
|----------|-------------|-------|------------|-------------------------------------------------------------------------------|
| RSP_0260 | <i>bchZ</i> | -1.44 | 0.00119805 | putative chlorophyllide reductase, BchZ subunit                               |
| RSP_0261 | <i>bchY</i> | -1.60 | 0.00000950 | Chlorophyllide reductase, BchY subunit                                        |
| RSP_0262 | <i>bchX</i> | -1.27 | 0.00000014 | Chlorophyllide reductase, BchX subunit                                        |
| RSP_0263 | <i>bchC</i> | -0.92 | 0.00002143 | 3-hydroxyethyl bacteriochlorophyllide a dehydrogenase                         |
| RSP_0271 | <i>crtI</i> | -0.82 | 0.00000107 | phytoene dehydrogenase                                                        |
| RSP_0277 | <i>bchP</i> | -1.22 | 0.00000189 | Geranylgeranyl hydrogenase                                                    |
| RSP_0281 | <i>bchE</i> | -1.48 | 0.00000036 | Magnesium-protoporphyrin IX monomethylester oxidative cyclase, 66 kDa subunit |
| RSP_0286 | <i>bchB</i> | -0.91 | 0.00023489 | light-independent protochlorophyllide reductase subunit B                     |
| RSP_0287 | <i>bchH</i> | -1.49 | 0.00042155 | Magnesium-chelatase subunit H                                                 |
| RSP_0288 | <i>chlL</i> | -0.99 | 0.00021979 | protochlorophyllide reductase iron-sulfur ATP-binding protein                 |
| RSP_0292 |             | -1.42 | 0.00105979 | putative photosynthetic complex assembly protein                              |
| RSP_0293 | <i>puhC</i> | -1.30 | 0.00002280 | photosynthetic complex assembly protein                                       |
| RSP_0294 |             | -1.54 | 0.00001231 | magnesium-protoporphyrin IX monomethyl ester cyclase                          |

##### Motility/chemotaxis

|          |             |       |            |                                                                                    |
|----------|-------------|-------|------------|------------------------------------------------------------------------------------|
| RSP_0044 | <i>tlpT</i> | -1.14 | 0.00333636 | putative cytoplasmic chemoreceptor, TlpT                                           |
| RSP_0067 |             | -0.89 | 0.02958180 | Putative methyl-accepting chemotaxis protein                                       |
| RSP_0069 | <i>fliC</i> | -1.10 | 0.00318698 | Flagellar filament protein                                                         |
| RSP_0077 | <i>flgH</i> | -1.27 | 0.00112242 | Flagellar L-ring protein                                                           |
| RSP_1905 | <i>cpaF</i> | -1.05 | 0.03012460 | Putative Flp pilus assembly protein ATPase CpaF                                    |
| RSP_1909 | <i>cpaC</i> | -1.11 | 0.00050138 | Outer membrane general secretion pathway protein, Secretin, pilus assembly protein |
| RSP_1910 | <i>cpaB</i> | -0.83 | 0.00657392 | Flp pilus assembly protein CpaB                                                    |
| RSP_3083 | <i>mcpH</i> | -1.01 | 0.01301620 | methyl accepting chemotaxis protein                                                |
| RSP_3708 | <i>mcpJ</i> | -0.88 | 0.00037401 | methyl accepting chemotaxis protein                                                |

##### Others

|          |             |       |            |                                                                          |
|----------|-------------|-------|------------|--------------------------------------------------------------------------|
| RSP_0085 |             | -1.13 | 0.00475473 | multisensor hybrid histidine kinase                                      |
| RSP_0465 |             | -1.09 | 0.00011582 | putative protease                                                        |
| RSP_0688 |             | -2.10 | 0.00000455 | Probable penicillin-binding protein                                      |
| RSP_1188 | <i>wcaG</i> | -1.00 | 0.00980639 | Nucleotide sugar epimerase/dehydratase                                   |
| RSP_1272 |             | -0.84 | 0.00003624 | RNA polymerase sigma factor                                              |
| RSP_1274 |             | -1.62 | 0.00017836 | two-component response regulator                                         |
| RSP_1425 |             | -0.86 | 0.03295820 | plasmid replication initiation protein                                   |
| RSP_1468 | <i>ccrM</i> | -2.14 | 0.00060974 | Site-specific DNA-methyltransferase                                      |
| RSP_1791 | <i>zntA</i> | -0.85 | 0.01896920 | heavy metal-translocating P-type ATPase                                  |
| RSP_1818 | <i>feoB</i> | -1.50 | 0.01878450 | Fe2+ transport system protein B                                          |
| RSP_2166 | <i>putA</i> | -0.98 | 0.00535854 | bifunctional proline dehydrogenase/pyrroline-5-carboxylate dehydrogenase |
| RSP_2380 | <i>catC</i> | -0.87 | 0.02405100 | Catalase                                                                 |
| RSP_2446 | <i>treS</i> | -0.98 | 0.00235158 | trehalose synthase                                                       |
| RSP_2495 | <i>nrd</i>  | -2.25 | 0.00000093 | ribonucleotide-diphosphate reductase alpha subunit                       |
| RSP_2738 |             | -1.25 | 0.00007486 | Probable Rhodanese-related sulfurtransferase                             |
| RSP_2774 |             | -1.33 | 0.00325742 | peptidoglycan binding domain-containing protein                          |
| RSP_2888 | <i>nsrR</i> | -1.24 | 0.00234503 | Transcriptional regulator                                                |
| RSP_3154 |             | -0.89 | 0.01720220 | nitrate/sulfonate/bicarbonate ABC transporter ATPase                     |
| RSP_4157 |             | -1.07 | 0.01397770 | Radical SAM superfamily protein                                          |
| RSP_4242 |             | -1.93 | 0.02229770 | Hemolysin-type calcium-binding protein                                   |
| RSP_4284 |             | -1.05 | 0.01019410 | YD repeat-containing protein                                             |
| RSP_6091 |             | -1.85 | 0.02617120 | hypothetical protein                                                     |
| RSP_6111 | <i>ureC</i> | -1.21 | 0.04497700 | Urea amidohydrolase (urease) alpha subunit                               |

---
