# Supplementary material for: Integrative “Omics”-Approach Discovers Dynamic and Regulatory Features of Bacterial Stress Responses
Source: PubMed Central journal article supplement (PMC3688512; doi:10.1371/journal.pgen.1003576), 2013-06-20
Supplement: pgen.1003576.s012.pdf [file pgen.1003576.s012.pdf]

**Table S4. Putative new open reading frames (ORFs) identified by SILAC-based MS.**

| ORF ID <sup>1</sup> | Position <sup>2</sup> | Replicon  | Strand | Detected aa-seq <sup>3</sup>                                                                                                                                                                                                  | RNA-seq <sup>4</sup> |
|---------------------|-----------------------|-----------|--------|-------------------------------------------------------------------------------------------------------------------------------------------------------------------------------------------------------------------------------|----------------------|
| ID-19ORF-14558      | 3019891..3020211      | Chr 1     | Plus   | AIDACETRQAAAK<br>ARSMAAAISK<br>VAMAQGRTPPEIASI                                                                                                                                                                                | yes                  |
| ID-19ORF-3983       | 798262..798396        | Chr 1     | Plus   | EEAVYVEQPAVTTEPVYTGK<br>KEEAVYVEQPAVTTEPVYTGK                                                                                                                                                                                 | yes                  |
| ID-22ORF-3245       | 2491636..2491836      | Chr 1     | Minus  | AQRNPAMDAIK<br>EEIARISQA<br>HETISTSVEK<br>IKEEIARISQA                                                                                                                                                                         | yes                  |
| ID-23ORF-6817       | 1704578..1704952      | Chr 1     | Minus  | IIAAMNAGSRIK<br>TRRVEGSAYEYESD                                                                                                                                                                                                | (yes)                |
| ID-24ORF-1183       | 2930079..2930258      | Chr 1     | Minus  | TYVGYPIPSK<br>VMVRVDEK<br>VMVRVDEKTYVGYPIPSKRAA                                                                                                                                                                               | yes                  |
| ID-24ORF-7452       | 1618890..1619105      | Chr 1     | Minus  | AAPAKPRPGAPEAGPQAGGARSAAK<br>PRPGAPEAGPQAGGARSAAK<br>RIFTGRGPK                                                                                                                                                                | (yes)                |
| ID-24ORF-8403       | 1411515..1412336      | Chr 1     | Minus  | FQPIPIWK<br>MVSIDSWSVK<br>(NAAVPNAIRVYFRTAPFK)                                                                                                                                                                                | no                   |
| ID-23ORF-10842      | 879464..879868        | Chr 1     | Minus  | AVSAIVVPARGDWSTAAPK<br>AVSAIVVPARGDWSTAAPKK                                                                                                                                                                                   | yes                  |
| ID-24ORF-3701       | 2370426..2370683      | Chr 1     | Minus  | ARAAREAGPGDAPE<br>GPAAESREDRIK                                                                                                                                                                                                | yes                  |
| ID-30ORF-1184       | 723678..723917        | Chr 2     | Minus  | GETPITIAGK<br>GETPITIAGKK<br>VVETASYTK                                                                                                                                                                                        | no                   |
| ID-29ORF-1154       | 709835..710188        | Chr 2     | Minus  | INQGRSISTNVDDAVK<br>KINQGRSISTNVDDAVK                                                                                                                                                                                         | yes                  |
| ID-29ORF-854        | 753206..753412        | Chr 2     | Minus  | AAIQERAINSSARA<br>DDGSIIIMK                                                                                                                                                                                                   | yes                  |
| ID-33ORF-485        | 82294..82856          | Plasmid A | Plus   | AIVRTFASQVAERTPK<br>AIVRTFASQVAERTPKK<br>APRATPTPRRRQSPSSEDK<br>APRYTIRITVEAK<br>DPVPTDMPNRIAADASAAPVVAADQPEIARGETNPVGK<br>GIITRAGGSPISFRK<br>IPDSIRAAIIAVEGANPIEPAGTAISRNIAPVFAAFVRK<br>KAEYVPTDPVVYRIDIK<br>VIEEIDRIIGDMDDK | (yes)                |
| ID-36ORF-259        | 66453..66806          | Plasmid A | Minus  | KMQDVIASVVRTMK<br>MQDVIASVVRTMK<br>RISVDEVRAIK<br>SVHIRIDPEVFRFFK                                                                                                                                                             | yes                  |
| ID-36ORF-125        | 87675..88235          | Plasmid A | Minus  | ATREFVRENNRFAAIVANGIQNFIGMPK<br>YEIIRQK                                                                                                                                                                                       | yes                  |
| ID-12ORF-430        | 39639..39851          | Plasmid C | Minus  | AAIIEYRIK<br>ASAIREIIERK                                                                                                                                                                                                      | (yes)                |
| ID-15ORF-21         | 3552..4511            | Plasmid D | Plus   | DPVRVSIEIRIPIAFANK<br>IIADGMK<br>IIADGMKK<br>KVPRYTPK<br>VPRYTPK                                                                                                                                                              | yes                  |
| ID-13ORF-467        | 66469..67086          | Plasmid D | Plus   | QVRYEPRIIK<br>SSVTVPIRPEVRNQREIWDIVISYGSK<br>TWPGIASFVTQYTPEK                                                                                                                                                                 | yes                  |
| ID-41ORF-21         | 32681..33253          | Plasmid E | Minus  | EYGVDSVK<br>TNVPENNAIIVINGSEVSTAIHRQNK                                                                                                                                                                                        | yes                  |

<sup>1</sup> Identifier for ORFs according to *Rhodobacter sphaeroides* 2.4.1 ORF database.

<sup>2</sup> Position of ORF query sequence on particular replicon, referring to plus-strand orientation.

<sup>3</sup> Amino acid (aa) sequence detected by mass spectrometry.

<sup>4</sup> Presence of cDNA reads, potentially representing the mRNA of a new ORF, in RNA-seq data for *R. sphaeroides* 2.4.1 (yes: clear cDNA read coverage, (yes): weak cDNA read coverage, no: no cDNA read coverage above background).
