# Supplementary material for: Integrative “Omics”-Approach Discovers Dynamic and Regulatory Features of Bacterial Stress Responses
Source: PubMed Central journal article supplement (PMC3688512; doi:10.1371/journal.pgen.1003576), 2013-06-20
Supplement: pgen.1003576.s013.pdf [file pgen.1003576.s013.pdf]

**Table S5. New singlet oxygen-responsive genes found in this study.**

| Category/<br>Gene No.                     | Gene<br>Name | Cluster/<br>Source <sup>1</sup> | Total<br>7 min | Total<br>45 min | log <sub>2</sub> ratio |                | SILAC<br>90 min | Gene Description/function                                                              |
|-------------------------------------------|--------------|---------------------------------|----------------|-----------------|------------------------|----------------|-----------------|----------------------------------------------------------------------------------------|
|                                           |              |                                 |                |                 | Total<br>90 min        | Poly<br>90 min |                 |                                                                                        |
| <b>Stress defense</b>                     |              |                                 |                |                 |                        |                |                 |                                                                                        |
| RSP_0725                                  |              | 2C                              | 0.39           | 1.08            | 0.88                   | 0.81           | 1.05            | Thioredoxin, thioldisulfide interchange protein                                        |
| RSP_2413                                  | <i>lig2</i>  | 2B                              | 0.82           | 0.97            | 0.96                   | 0.23           | 1.91            | DNA ligase                                                                             |
| <b>Chaperones</b>                         |              |                                 |                |                 |                        |                |                 |                                                                                        |
| RSP_1024                                  | <i>moxR</i>  | 2A                              | 0.44           | 1.34            | 1.17                   | 1.50           | 1.69            | Putative MoxR family protein                                                           |
| RSP_2293                                  | <i>clpA</i>  | 2A                              | 0.66           | 1.41            | 1.18                   | 1.56           | 1.25            | Chaperonin clpA/B                                                                      |
| RSP_2310                                  | <i>groES</i> | 2B                              | 1.37           | 1.30            | 0.51                   | 2.14           | 0.70            | Chaperonin Cpn10 (GroES)                                                               |
| RSP_2311                                  | <i>groEL</i> | 3                               | 1.58           | 1.09            | 0.41                   | 1.59           |                 | chaperonin GroEL                                                                       |
| <b>Regulators</b>                         |              |                                 |                |                 |                        |                |                 |                                                                                        |
| RSP_1997                                  | <i>lexA</i>  | Poly                            | -0.25          | -0.02           | -0.14                  | 0.86           | -0.16           | LexA repressor                                                                         |
| RSP_2719                                  | <i>lrp</i>   | 2C                              | 0.24           | 0.86            | 0.73                   | 0.70           |                 | transcriptional regulator, AsnC/Lrp family                                             |
| RSP_2853                                  |              | 2C                              | 0.45           | 1.04            | 0.74                   | 0.26           | 0.65            | Transcriptional regulator, TetR family                                                 |
| RSP_3094                                  |              | Poly                            | 0.04           | 0.43            | 0.43                   | 0.89           |                 | Putative transmembrane anti-sigma factor                                               |
| RSP_3095                                  |              | Poly                            | -0.13          | 0.63            | 0.61                   | 1.09           |                 | RNA polymerase sigma-70 factor, ECF subfamily                                          |
| <b>Quorum sensing</b>                     |              |                                 |                |                 |                        |                |                 |                                                                                        |
| RSP_0123                                  | <i>cerI</i>  | Poly                            | -0.38          | 0.35            | 0.55                   | 1.56           | -0.31           | Autoinducer synthesis protein                                                          |
| RSP_6213                                  | <i>cerA</i>  | Poly                            | -0.26          | 0.51            | 0.49                   | 1.62           |                 | community escape response protein                                                      |
| <b>Iron metabolism</b>                    |              |                                 |                |                 |                        |                |                 |                                                                                        |
| RSP_0905                                  | <i>sitB</i>  | 1                               | 0.80           | 1.72            | 1.98                   | 1.39           |                 | ABC Mn+2/Fe+2 transporter, ATPase subunit                                              |
| RSP_0906                                  | <i>sitC</i>  | 2A                              | 0.66           | 1.25            | 1.41                   | 0.77           |                 | ABC Mn+2/Fe+2 transporter, inner membrane subunit                                      |
| RSP_0908                                  | <i>sitD</i>  | 2C                              | 0.45           | 0.92            | 1.06                   | 0.34           |                 | ABC Mn+2/Fe+2 transporter, inner membrane subunit                                      |
| RSP_0437                                  | <i>sufC</i>  | Poly                            | 0.49           | 0.39            | 0.56                   | 1.52           | 0.44            | Suf C, ATPase                                                                          |
| RSP_0440                                  | <i>sufB</i>  | Poly                            | 0.48           | 0.49            | 0.70                   | 1.19           | 0.38            | putative SufB                                                                          |
| <b>Amino acid &amp; sulfur metabolism</b> |              |                                 |                |                 |                        |                |                 |                                                                                        |
| RSP_1352                                  | <i>serA</i>  | 3                               | 1.15           | -0.56           | -0.63                  | -0.52          | -0.01           | D-3-phosphoglycerate dehydrogenase                                                     |
| RSP_1941                                  | <i>cysH</i>  | 3                               | 1.08           | -0.36           | -0.25                  | -0.02          | -0.67           | phosphoadenosine phosphosulfate reductase                                              |
| RSP_1942                                  | <i>cysI</i>  | 3                               | 1.13           | -0.14           | 0.02                   | 0.11           | -0.21           | Sulfite/nitrite reductase hemoprotein subunit                                          |
| RSP_1944                                  | <i>cysG</i>  | 3                               | 1.22           | 0.02            | 0.17                   | 0.14           |                 | Uroporphyrin-III C-methyltransferase/siroheme synthase                                 |
| <b>Redox reaction</b>                     |              |                                 |                |                 |                        |                |                 |                                                                                        |
| RSP_0351                                  |              | 2A                              | 0.89           | 1.27            | 1.02                   | 1.32           | 2.34            | D-threo-aldose 1-dehydrogenase                                                         |
| RSP_1411                                  | <i>yedZ</i>  | 2B                              | 0.69           | 1.23            | 0.94                   | 0.29           |                 | sulfite oxidase subunit YedZ                                                           |
| RSP_1545                                  |              | 2C                              | 0.64           | 0.95            | 0.73                   | 0.18           |                 | Probable thiol oxidoreductase with 2 cytochrome c heme-binding sites                   |
| RSP_2199                                  |              | 2C                              | 0.59           | 0.90            | 0.48                   | 1.03           | 1.01            | putative acyl-CoA dehydrogenase                                                        |
| RSP_2395                                  |              | SILAC                           | -0.60          | -0.19           | 0.42                   | 0.13           | 1.15            | BCCP, cytochrome c peroxidase                                                          |
| RSP_2661                                  |              | 3                               | 0.90           | 0.29            | 0.43                   | 0.66           |                 | Iron-containing alcohol dehydrogenase                                                  |
| RSP_2878                                  | <i>coxS</i>  | Poly                            | -0.17          | -1.08           | 0.27                   | 0.93           | -0.21           | Putative carbon-monoxide dehydrogenase small chain                                     |
| RSP_2948                                  |              | Poly                            | -0.56          | -0.14           | 0.28                   | 1.09           | 0.01            | indolepyruvate ferredoxin oxidoreductase                                               |
| RSP_3183                                  |              | 2C                              | 0.50           | 0.90            | 0.97                   | 1.34           |                 | 3-hydroxyacyl-CoA dehydrogenase type II                                                |
| <b>Transporters</b>                       |              |                                 |                |                 |                        |                |                 |                                                                                        |
| RSP_1203                                  |              | SILAC                           | 0.64           | 0.63            | 0.47                   | 0.05           | 1.07            | ABC multidrug efflux pump, fused ATPase and inner membrane subunits                    |
| RSP_1853                                  | <i>trkH2</i> | 1                               | 1.24           | 1.65            | 1.66                   | 0.74           |                 | potassium uptake transporter, transmembrane component, TrkH                            |
| RSP_1854                                  | <i>trkH3</i> | 3                               | 1.07           | 0.57            | 0.74                   | -0.20          |                 | potassium uptake transporter, transmembrane component, TrkH                            |
| RSP_2373                                  |              | 2C                              | 0.24           | 0.87            | 0.76                   | 0.33           |                 | Putative Transporter, Major facilitator superfamily (MFS)                              |
| RSP_3273                                  |              | 2B                              | 0.98           | 1.08            | 0.91                   | 0.20           |                 | ABC multidrug/carbohydrate efflux transporter, inner membrane subunit                  |
| RSP_3386                                  |              | SILAC                           | 0.17           | 0.45            | 0.63                   | 0.68           | 0.92            | TRAP-T family transporter, periplasmic binding protein                                 |
| RSP_3603                                  |              | 2B                              | 0.94           | 1.18            | 0.91                   | 0.36           |                 | Possible ABC efflux transporter, fused inner membrane domains                          |
| <b>Carbohydrate metabolism</b>            |              |                                 |                |                 |                        |                |                 |                                                                                        |
| RSP_2115                                  | <i>envA</i>  | 2C                              | 0.34           | 1.07            | 1.18                   | 1.07           |                 | putative UDP-3-O-acyl N-acetylglucosamine deacetylase                                  |
| RSP_2196                                  | <i>fadJ</i>  | SILAC                           | 0.43           | 0.69            | 0.41                   | 0.55           | 0.89            | enoyl-CoA hydratase / 3-hydroxyacyl-CoA dehydrogenase / 3-hydroxybutyryl-CoA epimerase |
| RSP_2550                                  | <i>exoK</i>  | 2C                              | 0.34           | 1.02            | 0.74                   | 0.77           | 1.67            | endo-beta-1,3-1,4-glycanase protein                                                    |

**Others**

|          |              |       |       |       |       |       |       |                                                                               |
|----------|--------------|-------|-------|-------|-------|-------|-------|-------------------------------------------------------------------------------|
| RSP_0439 |              | Poly  | 0.55  | 0.32  | 0.44  | 1.04  |       | hypothetical protein                                                          |
| RSP_0483 |              | Poly  | 0.14  | 0.45  | 0.35  | 0.81  |       | hypothetical protein                                                          |
| RSP_0569 |              | 2B    | 0.71  | 1.05  | 0.79  | 0.44  |       | hypothetical protein                                                          |
| RSP_0600 |              | 1     | 2.21  | 1.89  | 2.06  | 1.18  |       | hypothetical protein                                                          |
| RSP_0730 |              | 2C    | 0.45  | 0.88  | 0.77  | 0.06  |       | hypothetical protein                                                          |
| RSP_0846 | <i>ribA</i>  | 3     | 0.97  | 0.55  | 0.71  | 0.62  |       | GTP cyclohydrolase II                                                         |
| RSP_0850 |              | 2C    | 0.48  | 0.83  | 1.08  | 1.36  |       | hypothetical protein                                                          |
| RSP_1000 |              | 2C    | 0.27  | 0.91  | 0.80  | 0.36  |       | hypothetical protein                                                          |
| RSP_1022 |              | 2C    | 0.47  | 0.95  | 0.86  | 0.20  |       | conserved hypothetical protein (possibly transmembrane)                       |
| RSP_1023 |              | 2C    | 0.44  | 1.03  | 0.88  | 0.22  |       | hypothetical protein                                                          |
| RSP_1027 |              | Poly  | 0.21  | 0.47  | 0.25  | 0.85  |       | hypothetical protein                                                          |
| RSP_1045 | <i>trmD</i>  | Poly  | 0.05  | -0.26 | -0.44 | 1.07  |       | tRNA (guanine-N1-)-methyltransferase                                          |
| RSP_1157 | <i>PSrp1</i> | Poly  | -0.56 | 0.12  | 0.47  | 0.80  | -0.02 | Ribosomal subunit interface protein Y                                         |
| RSP_1199 |              | 2C    | 0.19  | 1.07  | 1.01  | 1.29  | 0.82  | secreted conserved hypothetical protein                                       |
| RSP_1280 | <i>cbbX</i>  | SILAC | 0.23  | 0.48  | 0.38  | -0.23 | 0.98  | CbbX protein                                                                  |
| RSP_1383 |              | Poly  | -0.24 | 0.21  | 0.12  | 0.85  | 0.28  | hypothetical protein                                                          |
| RSP_1399 |              | 2C    | 0.52  | 0.86  | 0.73  | 0.31  |       | N-formylglutamate amidohydrolase                                              |
| RSP_1465 |              | SILAC | 0.22  | 0.68  | 0.58  | 0.52  | 0.88  | hypothetical protein                                                          |
| RSP_1540 |              | 2B    | 0.66  | 1.16  | 1.00  | 0.42  | 1.63  | Predicted secreted hydrolase                                                  |
| RSP_1759 |              | 2A    | 0.91  | 1.51  | 1.37  | 0.84  |       | hypothetical protein                                                          |
| RSP_2202 |              | 2C    | -0.04 | 0.68  | 0.81  | 0.21  |       | hypothetical protein                                                          |
| RSP_2235 |              | 2C    | 0.62  | 0.84  | 0.64  | 0.17  |       | hypothetical protein                                                          |
| RSP_2390 | <i>acuC1</i> | 2A    | 0.96  | 1.22  | 1.17  | 0.03  |       | putative Acetoin utilization protein                                          |
| RSP_2391 | <i>ligT</i>  | 2B    | 0.81  | 0.89  | 0.83  | 0.16  |       | 2'-5' RNA ligase                                                              |
| RSP_2480 |              | 2C    | 0.49  | 1.00  | 0.89  | 0.98  |       | hypothetical protein                                                          |
| RSP_2585 |              | Poly  | -0.65 | -1.02 | 0.00  | 1.05  | 0.00  | hypothetical protein                                                          |
| RSP_2613 | <i>plsX</i>  | Poly  | 0.15  | 0.27  | 0.14  | 0.80  | -0.02 | fatty acid/phospholipid synthesis protein                                     |
| RSP_2624 |              | Poly  | 0.10  | 0.58  | 0.37  | 1.08  |       | hypothetical protein                                                          |
| RSP_3073 |              | Poly  | 0.21  | 0.20  | 0.35  | 0.86  |       | ErfK/YbiS/YcfS/YnhG family protein                                            |
| RSP_3092 |              | Poly  | -0.29 | 0.67  | 0.70  | 1.45  |       | hypothetical protein                                                          |
| RSP_3093 |              | Poly  | -0.35 | 0.57  | 0.56  | 0.88  |       | Predicted integral membrane protein                                           |
| RSP_3265 |              | 2A    | 0.41  | 1.52  | 1.04  | 0.26  |       | hypothetical protein                                                          |
| RSP_3331 |              | 2C    | -0.07 | 0.69  | 0.86  | -0.25 |       | Cupin domain containing protein                                               |
| RSP_3351 |              | 2A    | 1.23  | 1.23  | 1.16  | 1.56  |       | hypothetical protein                                                          |
| RSP_3509 | <i>expE1</i> | Poly  | -0.04 | 0.29  | 0.50  | 1.56  |       | Hemolysin-type calcium-binding region, RTX                                    |
| RSP_3653 |              | 2C    | 0.34  | 0.95  | 0.51  | 0.36  |       | hypothetical protein                                                          |
| RSP_3866 |              | 1     | 1.83  | 2.00  | 1.79  | 2.51  |       | conserved hypothetical protein                                                |
| RSP_4124 |              | SILAC | 0.63  | 0.31  | 0.00  | 0.11  | 1.02  | hypothetical protein                                                          |
| RSP_4254 | <i>mk</i>    | Poly  | 0.67  | 0.55  | 0.32  | 1.27  |       | putative regulator of nucleoside diphosphate kinase protein                   |
| RSP_6016 |              | 2A    | 0.84  | 1.50  | 1.16  | 1.03  |       | hypothetical protein                                                          |
| RSP_6022 |              | 2C    | 0.07  | 0.93  | 0.63  | 0.69  |       | hypothetical protein                                                          |
| RSP_6060 |              | Poly  | 0.02  | 0.61  | 0.62  | 0.82  |       | hypothetical protein                                                          |
| RSP_6106 |              | 2A    | 0.80  | 1.34  | 1.41  | 0.61  |       | hypothetical protein                                                          |
| RSP_6107 |              | 2A    | 0.89  | 1.57  | 1.30  | 1.67  | 0.52  | hypothetical protein                                                          |
| RSP_6144 |              | SILAC | 0.25  | 0.73  | 0.62  | -0.04 | 1.22  | conserved hypothetical protein (possible transmembrane)                       |
| RSP_6156 |              | 2C    | 0.37  | 0.82  | 0.67  | 0.89  |       | hypothetical protein                                                          |
| RSP_6176 |              | 2B    | 0.76  | 0.92  | 0.73  | 1.24  |       | putative tail fiber assembly protein                                          |
| RSP_6229 |              | 1     | 1.15  | 1.56  | 1.44  | 0.32  | 1.66  | hypothetical protein                                                          |
| RSP_6230 |              | Poly  | 0.15  | 0.58  | 0.49  | 1.10  |       | hypothetical protein                                                          |
| RSP_0602 | <i>cobP</i>  | 2B    | 1.24  | 1.19  | 1.01  | 0.34  | 0.00  | Possible adenosyl cobinamide kinase/ cobinamide phosphate guanylyltransferase |
| RSP_0356 | <i>hflC</i>  | 2C    | 0.67  | 0.84  | 0.53  | 0.75  | 0.60  | HflC protein; membrane protease subunit HflC                                  |

<sup>1</sup> Newly identified genes originating from cluster analysis (compare Fig. 2 and Table S1), from polysomal RNA analysis (Poly), or from SILAC-based proteomics (SILAC).
